# Supplementary material for: Caspase-8, association with Alzheimer’s Disease and functional analysis of rare variants
Source: PubMed Central journal article supplement (PMC5630132; doi:10.1371/journal.pone.0185777), 2017-10-06
Supplement: pone.0185777.s004.pdf [file pone.0185777.s004.pdf]

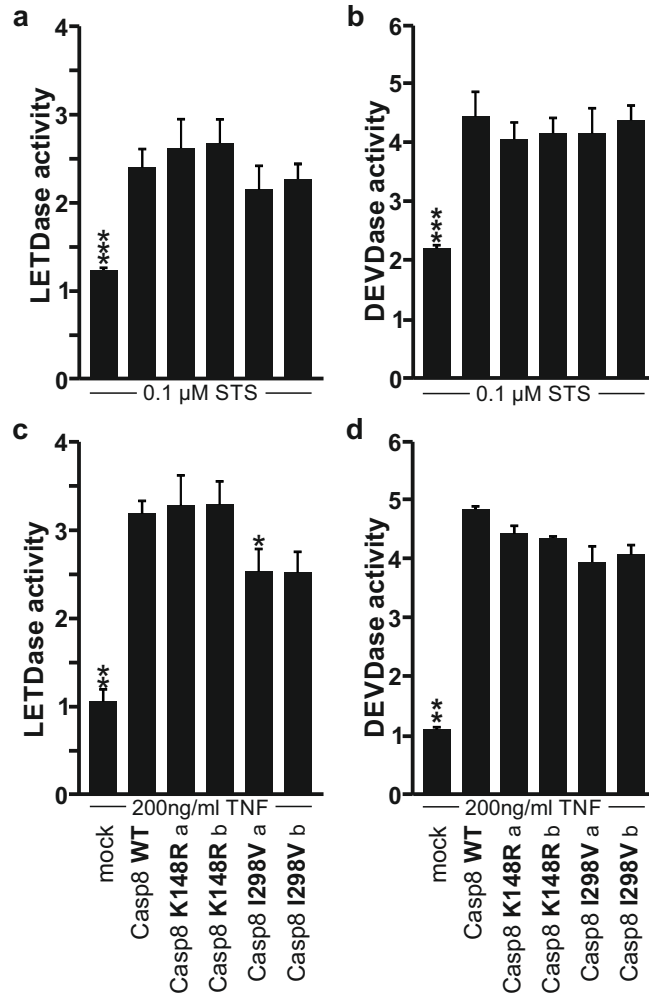

supplementary Figure 1. Rehker J, Rodhe J, et al.
