# Supplementary material for: Caspase-8, association with Alzheimer’s Disease and functional analysis of rare variants
Source: PubMed Central journal article supplement (PMC5630132; doi:10.1371/journal.pone.0185777), 2017-10-06
Supplement: pone.0185777.s005.pdf [file pone.0185777.s005.pdf]

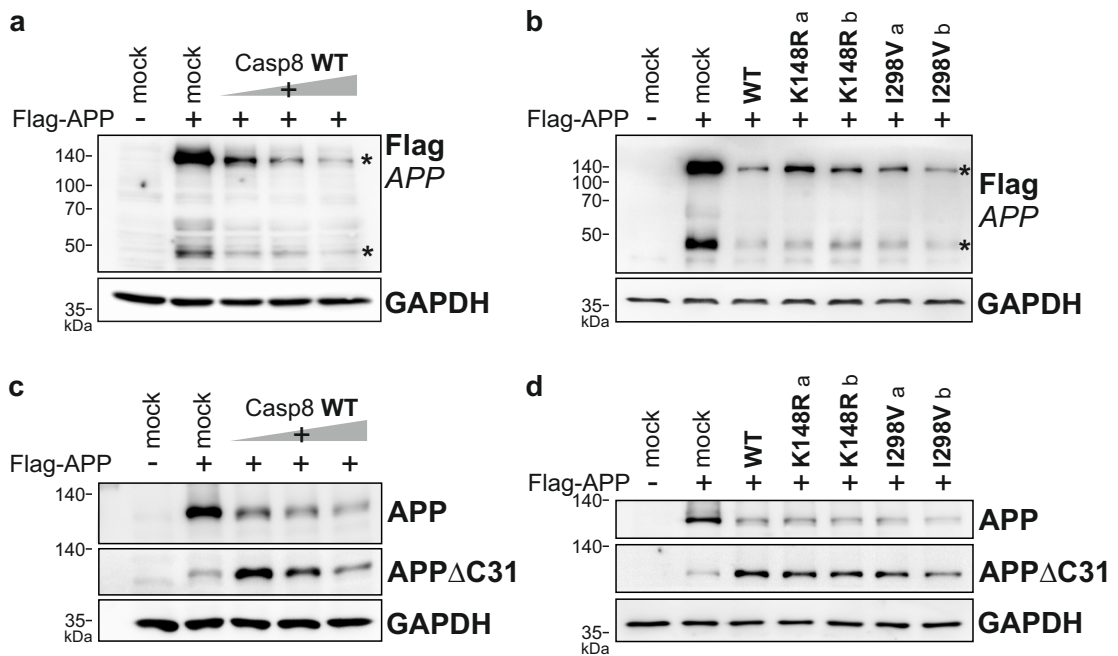

Supplementary Figure 2. Rehker J, *et al.*
